# Supplementary material
Source: PubMed Central journal article supplement (PMC4050626)
Supplement: 1323011111_pnas.201323011SI.pdf [file 1323011111_pnas.201323011SI.pdf]

# Supporting Information

Zhu et al. 10.1073/pnas.1323011111

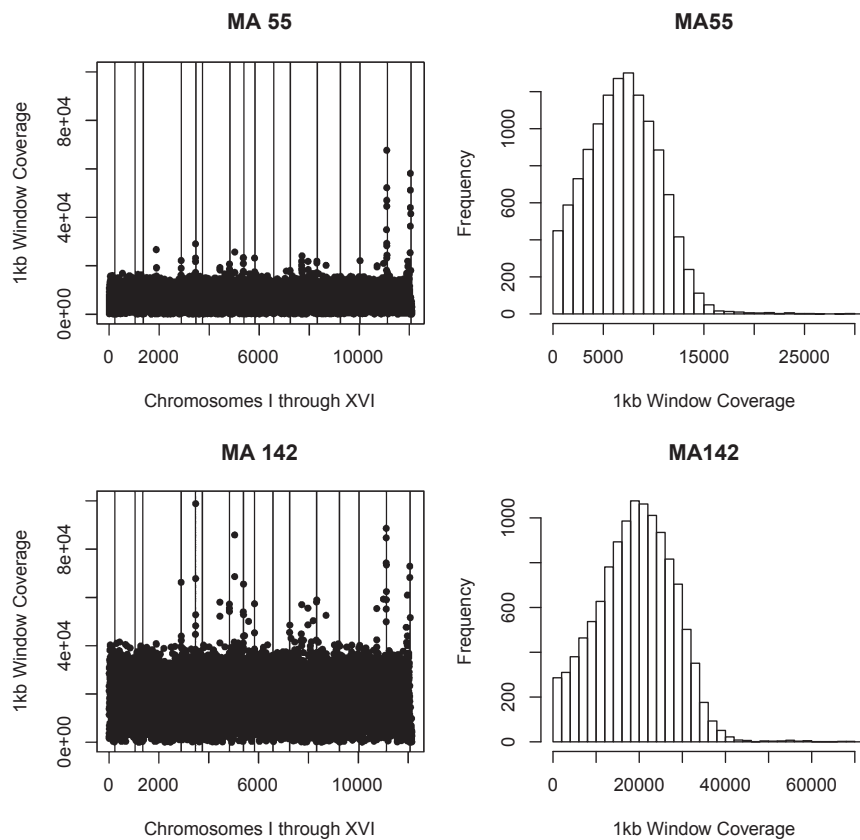

**Fig. S1.** Whole-genome coverage (1-kb windows) of two MA strains without aneuploidy.

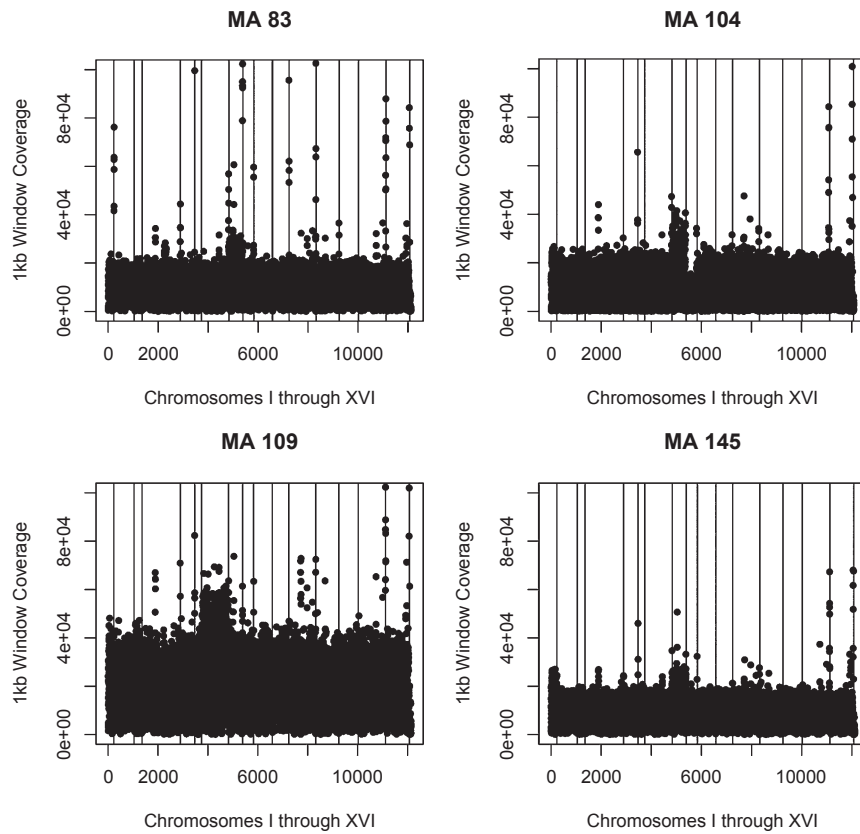

**Fig. S2.** Whole-genome coverage (1-kb windows) of four MA strains with aneuploidy.

## Other Supporting Information Files

[Dataset S1 \(TXT\)](#)
